# Supplementary material for: Low molecular weight PEI-based biodegradable lipopolymers as gene delivery vectors
Source: Royal Society of Chemistry journal article supplement (doi:10.1039/c2ob27211c), 2012-12-12
Supplement: c2ob27211c.pdf [file c2ob27211c.pdf]

## Electronic Supplementary Information

# Low molecular weight PEI-based biodegradable lipopolymers as gene delivery vectors

Miao-Miao Xun<sup>1</sup>, Xue-Chao Zhang<sup>1</sup>, Ji Zhang<sup>\*</sup>, Qian-Qian Jiang, Wen-Jing Yi, Wen Zhu<sup>\*</sup> and  
Xiao-Qi, Yu<sup>\*</sup>

*Key Laboratory of Green Chemistry and Technology (Ministry of Education), College of Chemistry, and  
State Key Laboratory of Biotherapy, West China Hospital, Sichuan University, Chengdu 610064, People's  
Republic of China.*

\* Corresponding author. Tel.: +86 28 8541 8580, +86 28 8516 4063; fax: +86 28 8541 8580

*E-mail address:* ji\_zhang@163.com (J. Zhang), xqyu@scu.edu.cn (X.-Q. Yu), zhuwen@scu.edu.cn (W.  
Zhu).

<sup>1</sup> These authors contributed equally to this work.

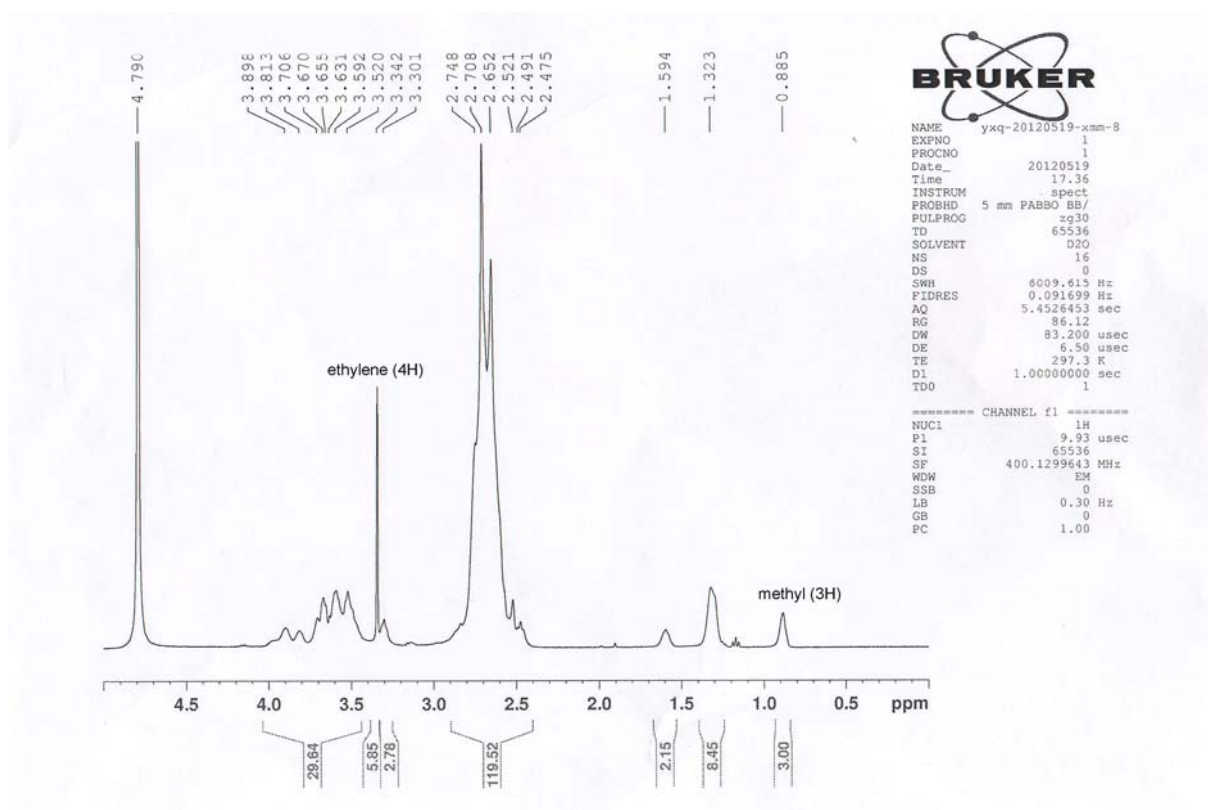

**Figure S1.**  $^1\text{H}$  NMR spectrum of LP2.

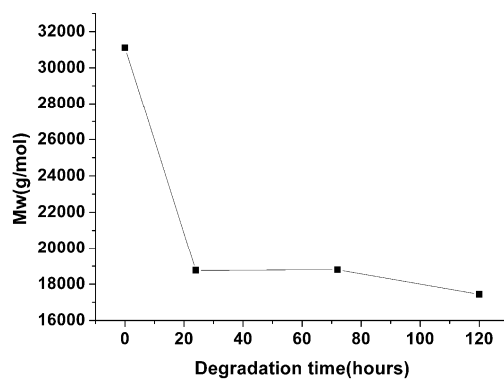

**Figure S2.** Change of molecular weight of LP2 ( $M_w = 31109$  Da) with degradation time in PBS (pH = 7.4).

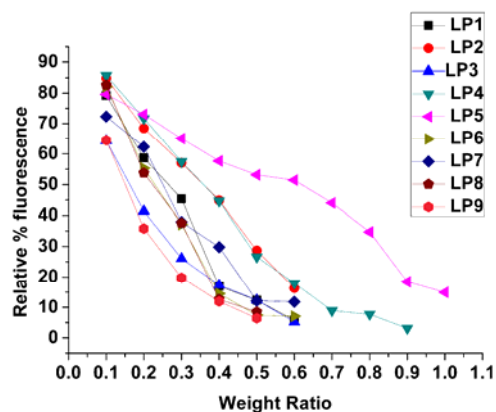

**Figure S3.** Change of relative fluorescence of EB bound to DNA by the addition of **LP1-LP9** to different weight ratios. All the samples were excited at 497 nm and the emission was measured at 600 nm. DNA concentration was  $10 \text{ mg mL}^{-1}$  in HEPES solution.

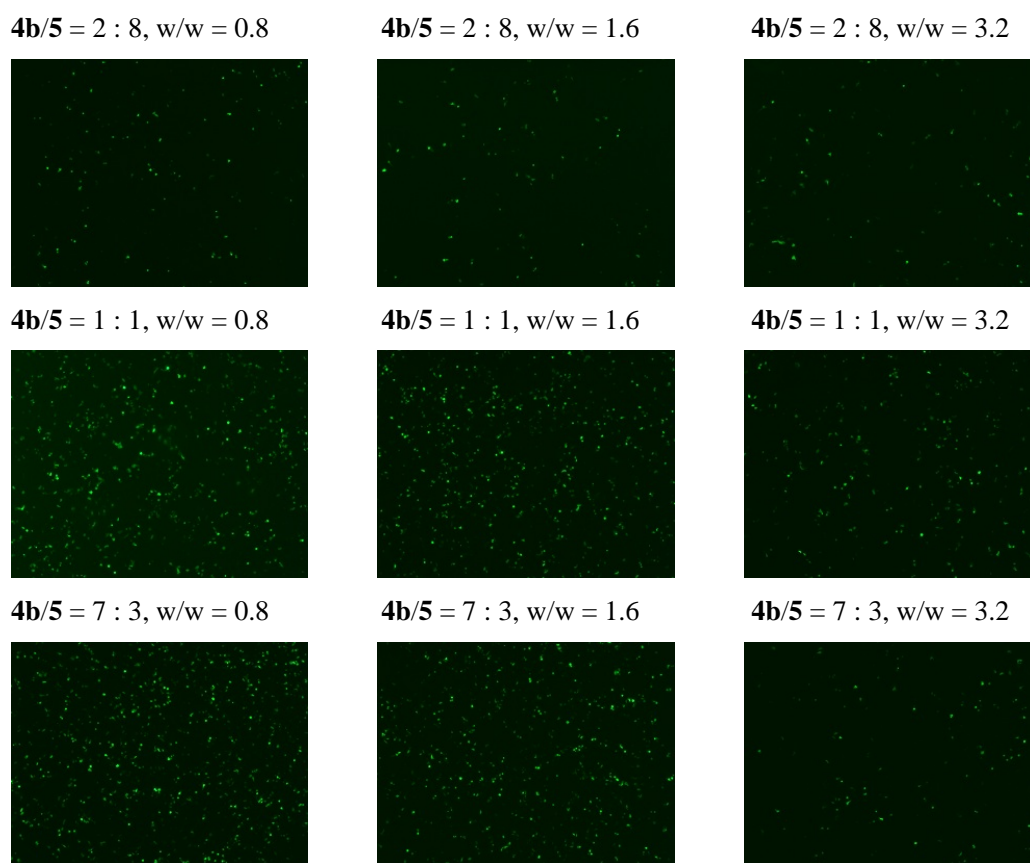

**Figure S4.** Fluorescent microscope images of pEGFP-transfected in A549 cells mediated by **LP2**, which were synthesized from different ratio of the linkers **4b** and **5** (the ratios were marked above each image).
